# Supplementary material
Source: Springer Nature journal article supplement (https://www.springermedizin.de/resource/supplementary/13058_2012_3150_MOESM12_ESM.pdf/9703386)

**A****HT17**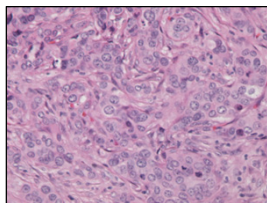

Patient primary tumor

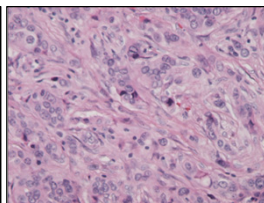

Xenograft primary tumor

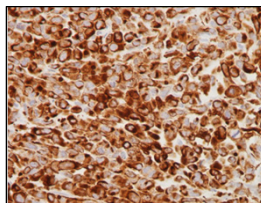

Anti-human cytokeratin in xenograft tumor

**C**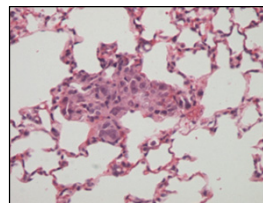

Lung metastasis in xenograft mice

**HT39**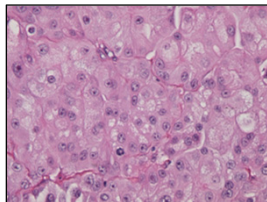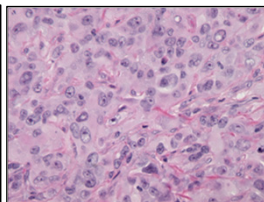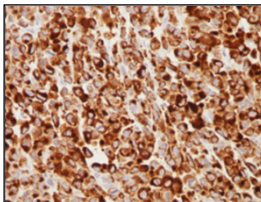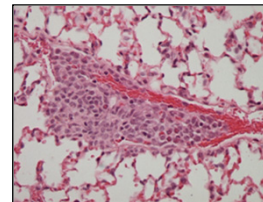**B**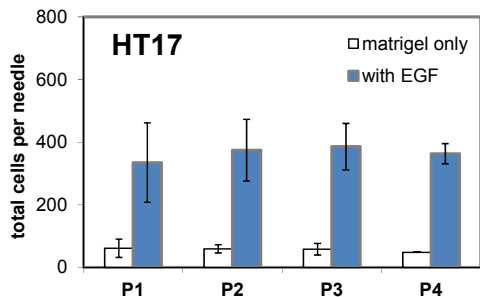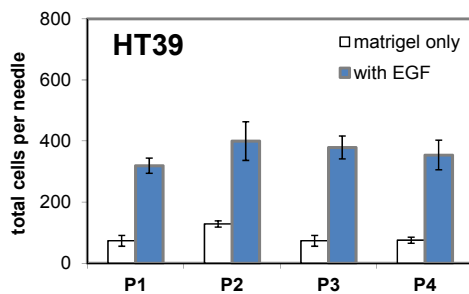

Supplement: MOESM12 [file 9703386]
